# Supplementary material for: Seroprevalence of West Nile Virus among Equids in Bulgaria in 2022 and Assessment of Some Risk Factors
Source: MDPI journal article supplement (doi:10.3390/vetsci11050209), 2024-05-09
Supplement: s1 [file s1]

Table S1. Distribution of the tested samples by province, municipality, region, species and sex.

| Province       | Municipality  | Region | N       |        |         |       |         |
|----------------|---------------|--------|---------|--------|---------|-------|---------|
|                |               |        | samples | horses | donkeys | males | females |
| Stara Zagora   | Stara Zagora  |        | 15      | 9      | 6       | 5     | 10      |
|                | Kazanlak      |        | 14      | 13     | 1       | 9     | 5       |
|                | Maglizh       |        | 5       | 5      | –       | 2     | 3       |
| <i>Total</i>   | 3             | SE     | 34      | 27     | 7       | 16    | 18      |
| Burgas         | Burgas        |        | 4       | 4      | –       | 3     | 1       |
|                | Ruen          |        | 27      | 27     | –       | –     | 27      |
|                | Tsarevo       |        | 9       | 9      | –       | 6     | 3       |
| <i>Total</i>   | 3             | SE     | 40      | 40     | –       | 9     | 31      |
| Plovdiv        | Plovdiv       |        | 1       | 1      | –       | –     | 1       |
| <i>Total</i>   | 1             | SC     | 1       | 1      | –       | –     | 1       |
| Haskovo        | Haskovo       |        | 2       | 2      | –       | 2     | –       |
|                | Svilengrad    |        | 64      | 64     | –       | 6     | 58      |
| <i>Total</i>   | 2             | SC     | 66      | 66     | –       | 8     | 58      |
| Smolyan        | Dospat        |        | 5       | 5      | –       | 3     | 2       |
|                | Devin         |        | 11      | 11     | –       | 5     | 6       |
|                | Chepelare     |        | 2       | 2      | –       | 2     | –       |
| <i>Total</i>   | 3             | SC     | 18      | 18     | –       | 10    | 8       |
| Blagoevgrad    | Satovcha      |        | 18      | 8      | 10      | 13    | 5       |
|                | Hadzhidimovo  |        | 21      | 9      | 12      | 15    | 6       |
| <i>Total</i>   | 2             | SW     | 39      | 17     | 22      | 28    | 11      |
| Pernik         | Pernik        |        | 5       | 5      | –       | 2     | 3       |
| <i>Total</i>   | 1             | SW     | 5       | 5      | –       | 2     | 3       |
| Sofia city     | Kremikovtsi   |        | 26      | 4      | 22      | –     | 26      |
| <i>Total</i>   |               | SW     | 26      | 4      | 22      | –     | 26      |
| Sofia province | Ihtiman       |        | 18      | 18     | –       | 7     | 11      |
|                | Samokov       |        | 13      | –      | 13      | 7     | 6       |
|                | Koprivshtitsa |        | 43      | 43     | –       | 13    | 30      |
| <i>Total</i>   | 3             | SW     | 74      | 61     | 13      | 27    | 47      |

|              |            |          |            |            |           |            |            |
|--------------|------------|----------|------------|------------|-----------|------------|------------|
| Montana      | Valchedram |          | 39         | 39         | –         | 16         | 23         |
| <i>Total</i> | 1          | NW       | 39         | 39         | –         | 16         | 23         |
| Vratsa       | Mizia      |          | 11         | 11         | –         | 3          | 8          |
| <i>Total</i> | 1          | NW       | 11         | 11         | –         | 3          | 8          |
| Pleven       | Nikopol    |          | 1          | 1          | –         | 1          | –          |
| <i>Total</i> | 1          | NC       | 1          | 1          | –         | 1          | –          |
| Gabrovo      | Gabrovo    |          | 3          | 3          | –         | 2          | 1          |
| <i>Total</i> | 1          | NC       | 3          | 3          | –         | 2          | 1          |
| Dobrich      | Dobrich    |          | 11         | 11         | –         | 7          | 4          |
| <i>Total</i> | 1          | NE       | 11         | 11         | –         | 7          | 4          |
| Varna        | Varna      |          | 10         | 10         | –         | 6          | 4          |
| <i>Total</i> | 1          | NE       | 10         | 10         | –         | 6          | 4          |
| <b>Total</b> | <b>25</b>  | <b>6</b> | <b>378</b> | <b>314</b> | <b>64</b> | <b>135</b> | <b>243</b> |
